# Supplementary material for: A petunia ethylene-responsive element binding factor, PhERF2, plays an important role in antiviral RNA silencing
Source: PubMed Central journal article supplement (PMC4892726; doi:10.1093/jxb/erw155), 2016-04-19
Supplement: supp_erw155_supplementary_figures_S1_S3_tables_S1_S2.pdf [file supp_erw155_supplementary_figures_S1_S3_tables_S1_S2.pdf]

gctttttcatcaatcttttccatcaaaaaatttac  
tctatcaaaaagcccaatctttacttttaaaaaaaaaaattgagctgagtgaatataaatc  
atggtggtggtgctataatttccgattacatacctccgaaccggacttctcgccggtta  
M C G G A I I S D Y I P P N R T S R R L  
accgctgagttactatggggtcgttccgatctgagtaaaaaatcaaaaaatccaagtaat  
T A E L L W G R S D L S K K S K N P S N  
tatcattcaaagcctttgagatctcaaatagttgaccttgacgatgacttcgaggctgat  
Y H S K P L R S Q I V D L D D D F E A D  
tttcaagagtttaagatttttcagatgatgaagatgttaaaccatttgctttttctgct  
F Q E F K D F S D D E D V K P F A F S A  
cccaaacagtccactggctccaaatctgtaaaatctgctgattcagagaaggatgctgat  
P K Q S T G S K S V K S A D S E K D A D  
agttcctctaagagaaagaggaagaatcagtataggggatcagacagcgaccttggggt  
S S S K R K R K N Q Y R G I R Q R P W G  
aagtggcagctgaaatacgtgacccaagtaaggtgttcgagtctggcttgaaccttc  
K W A A E I R D P S K G V R V W L G T F  
aatactgcagaagaagctgccagagcttatgatgttgaggctagaaggatcagaggcaat  
N T A E E A A R A Y D V E A R R I R G N  
aaagctaaggtgaatttcctgatgaagcgcagtgccatcttcaagacgcgctgttaag  
K A K V N F P D E A P V P S S R R A V K  
gtgaatcctcagaaggtccttcctagcctggactctgttcagccagacactactgtgatg  
V N P Q K V L P S L D S V Q P D T T V M  
aacaacctgaggaatggctattatgattctttgggatttcttgaagagaaacctgtggca  
N N L R N G Y Y D S L G F L E E K P V A  
aagcagtatggatatgaggatgggggcagtaacttctgtagatataggattcgactcattt  
K Q Y G Y E D G G S T S V D I G F D S F  
gcgcttcagctgggtgctgatatttacttcaactccgatgtgggaagcaactctttcgac  
A P S A G A D I Y F N S D V G S N S F D  
tgctctgactttggttgggagagccgtgcaccaggactccagagatatcatctgttctt  
C S D F G W G E P C T R T P E I S S V L  
tcagctgctatagaaagtaatgaagctcaatttgttgaagatgcccgtccagagaaaaaa  
S A A I E S N E A Q F V E D A R P E K K  
ctgaaatcagaccccaacaatccagtagctgatgatggaaacactgtgaacgagctatct  
L K S D P N N P V A D D G N T V N E L S  
gaagagctttcagcatttgaatctgagatgaagtttcttcagataccttatctggagggg  
E E L S A F E S E M K F L Q I P Y L E G  
aattgggatgcatcagctgataccttctcaacacaagtgcaactcaggatggtgaaat  
N W D A S A D T F L N T S A T Q D G E N  
gctatggacctctggtcatttgatgatgttccttctttgatgggaggtgtctac *taagtc*  
A M D L W S F D D V P S L M G G V Y -  
agagtgccttcttgcttagcttttgtaataaggcgtcatgtctgtctggtgatcgaaa  
gaagttgatccac

**Fig. S1.** Complete sequence of petunia *PhERF2* cDNA. The cDNA sequence of *PhERF2* possesses an open reading frame (ORF) of 1,137-bp nucleotides encoding a protein of 378 amino acids. The 291-bp fragment used for VIGS construct was marked with solid underline while the 339-bp fragment (fragment 2) used for VIGS confirmation and RNAi construct was marked with dashed underline. The conserved AP2/ERF domain from amino acids 109 to 167 was indicated with bold types shaded in grey.



**Fig. S2.** Amino acid sequence analysis of petunia PhERF2. (A) Alignment of deduced PhERF2 amino acid sequence and other similar proteins from *Petunia × hybrida* PhERF3 (ADP37418), *Nicotiana tabacum* NtCEF1 (AAP40022), *Solanum lycopersicum* SIJERF1 (NP\_001234513), *Capsicum annuum* CaPF1 (AAP72289), *Solanum tuberosum* StRAP2.12 (XP\_006342909), *Prunus salicina* PsERF2a (ACM49847), *Nelumbo nucifera* NnRAP2.12 (XP\_010273830), *Malus domestica* MdRAP2.12 (NP\_001280975), *Arabidopsis* AtRAP2.12 (NP\_175794) and AtRAP2.2 (NP\_566482). Identical amino acids are shown with asterisks. AP2/ERF domain is indicated in square. (B) Phylogenetic tree of petunia PhERF2 aligned with *Arabidopsis* group VII ERFs and homologs from other plant species. Phylogenetic relationship of PhERF2 with *Arabidopsis* AtRAP2.12 (NP\_175794), AtRAP2.2 (NP\_566482), AtERF71 (NP\_182274), AtRAP2.3 (NP\_188299), AtERF73 (NP\_001077812), *Petunia × hybrida* PhERF3 (ADP37418), *Solanum lycopersicum* SIJERF1 (NP\_001234513), *Capsicum annuum* CaPF1 (AAP72289), *Nicotiana tabacum* NtCEF1 (AAP40022), *Solanum tuberosum* StRAP2.12 (XP\_006342909), *Prunus salicina* PsERF2a (ACM49847), *Nelumbo nucifera* NnRAP2.12 (XP\_010273830), *Malus domestica* MdRAP2.12 (NP\_001280975). PhERF2 is highlighted with doubled underlines. PhERF3, one paralog of PhERF2 in petunia, was used for VIGS control in this study and marked with a dashed line. The tree was constructed using the neighbor-joining method with MEGA software (version 4.0.2). *Arabidopsis* AtERF1 (NP\_567530), one member of group IX ERFs, was used as the out-group. Boot-strap values were generated with 1000 replicates and shown at corresponding branch nodes.

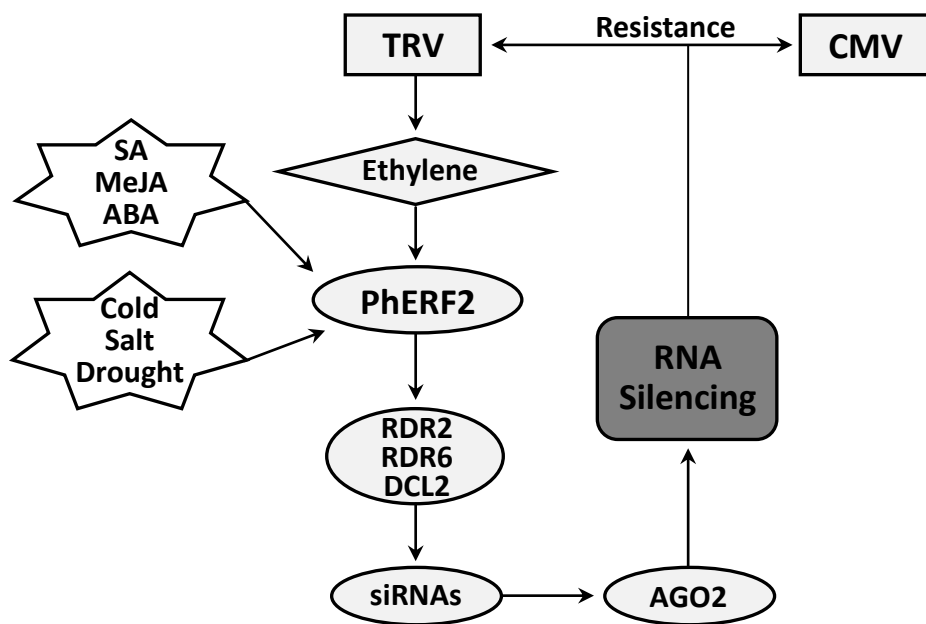

**Fig. S3.** A proposed model for the roles of PhERF2 in antiviral RNA silencing. Expression of *PhERF2* is induced by multiple factors, including ethylene, SA, MeJA, ABA, cold, high salinity and water deficit. PhERF2 positively influences RDR2, RDR6, DCL2, AGO2 expressions to improve siRNAs accumulation and enhance RNA silencing, which may trigger a broad resistance to TRV and CMV infections.

**Table S1.** Primers used for semi-quantitative and real-time quantitative RT-PCR.

| Primer name    | Accession no.    | 5'—3'                    | Product size                       |
|----------------|------------------|--------------------------|------------------------------------|
| vigsPhERF2(F1) | HQ259596         | GGTGGTGCTATAATTCCGATTA   | 291bp                              |
| vigsPhERF2(R1) |                  | AGCATCCTTCTCTGAATCAGCAG  |                                    |
| vigsPhERF2(F2) | HQ259596         | AACCTGAGGAATGGCTATTATGA  | 339bp                              |
| vigsPhERF2(R2) |                  | GTTTCCATCATCAGCTACTGGAT  |                                    |
| vigsPhERF3(F1) | HQ259597         | GAATTTGAAGCTGACTTTCAGGA  | 246bp                              |
| vigsPhERF3(R1) |                  | ATAAGCTCTGGCAGCTTCTTCTG  |                                    |
| PDS(F1)        | AY593974         | CAGTGCTTCTTGATCGCTTTGAA  | 138bp                              |
| PDS(R1)        |                  | TCTGACTTGGCCACCTTTTACT   |                                    |
| PDS(F2)        | AY593974         | CGAATAAGAAAGATCGAGCTGAA  | 130bp                              |
| PDS(R2)        |                  | CAGGCAAAAAGAAGCTTGAAAATA |                                    |
| CHS(F1)        | X14599           | ACCATTGGGCATTTCTGACTGGA  | 197bp                              |
| CHS(R1)        |                  | ATGAAGCCTTCTCATTTCATCC   |                                    |
| CHS(F2)        | X14599           | CTTGGATAGTTTGGTTGGACAAG  | 202bp                              |
| CHS(R2)        |                  | AGGAACATCTTTGAGCAAGTGAA  |                                    |
| TRV1(F1)       | AF406990         | CAGTCTATACACAGAAACAGA    | 463bp                              |
| TRV1(R1)       |                  | GACGTGTGTACTCAAGGGTT     |                                    |
| TRV2(F1)       | AF406991         | GGTTACTAGCGGCACTGAATAGA  | 225bp                              |
| TRV2(R1)       |                  | TAGTACTCCCTTGGTTCGTCGTA  |                                    |
| TRV2(F2)       | AF406991         | ACGGACGAGTGGACTTAGATTC   | Depending on the inserted fragment |
| TRV2(R2)       |                  | GTTTAATGTCTTCGGGACATGC   |                                    |
| RDR1(F1)       | CV299561         | TCATGATGTCACAATTGAGGAAG  | 271bp                              |
| RDR1(R1)       |                  | TTCGGAGTGATAGGTTGTCTTGT  |                                    |
| RDR2(F1)       | FN008007         | ACGATATGGTGGTTACAAAGGTG  | 190bp                              |
| RDR2(R1)       |                  | ATCCTCCACTCCCAAAGTAGAAA  |                                    |
| RDR6(F1)       | GT007757         | TTTGTGATCGGGAACATATAAA   | 277bp                              |
| RDR6(R1)       |                  | CATATGACTTTCTTGCCACTTCC  |                                    |
| DCL1(F1)       | FN028672         | GGAGAAAGTTGAACAGGATGATG  | 412bp                              |
| DCL1(R1)       |                  | CAACATCGACATCCAATACAATG  |                                    |
| DCL2(F1)       | FN020290         | TGGAACCTCTGACATCGTAGAAT  | 322bp                              |
| DCL2(R1)       |                  | ATATTCTGGAGGAAGAAGCCATC  |                                    |
| DCL3(F1)       | GBDQ010379<br>61 | GGAGACTTGTAATTTCTACGATC  | 206bp                              |

|                |          |                                          |        |
|----------------|----------|------------------------------------------|--------|
| DCL3(R1)       |          | TTTCAAGGCAACACAATATCTTT                  |        |
| DCL4(F1)       | FN002500 | AGGATATGATGAAACACCCTGTG                  | 222bp  |
| DCL4(R1)       |          | TAGCCTTTGAACCTGCATTAGAG                  |        |
| AGO1(F1)       | CV298592 | TCTATCAAAGTATCCGCCCTACA                  | 246bp  |
| AGO1(R1)       |          | CTTGAGATGTAAACCCGAGATG                   |        |
| AGO2(F1)       | FN018838 | GTTCAATCGGAGCTGATGTTAATC                 | 371bp  |
| AGO2(R1)       |          | GAAATAGCCGTGTATGGTGTCTC                  |        |
| AGO4(F1)       | FN031884 | GGAGGGTCCTAGATAGAGTGCAT                  | 368bp  |
| AGO4(R1)       |          | ATGCTGCCTCAAGATTATATCCA                  |        |
| rnaiPhERF2(F1) | HQ259596 | ATACTAGTGGCGCGCCAACCTGAGGAA<br>TGGCTATTA | 371bp  |
| rnaiPhERF2(R1) |          | ATGGATCCATTTAAATGTTTCCATCATCA<br>GCTACTG |        |
| oePhERF2(F1)   | HQ259596 | ATCTCGAGATGTGTGGTGGTGCTATAAT             | 1159bp |
| oePhERF2(R1)   |          | ATGAGCTCTTAGTAGACACCTCCCATCA             |        |
| CMVcp(F1)      | EU315691 | ACTGGTTTATCAGTACGCTGCAT                  | 150bp  |
| CMVcp(R1)      |          | ACTAACTCGTCTGTCTCGAGTGC                  |        |
| 26S rRNA(F1)   | AF479174 | AGCTCGTTTGATTCTGATTCCAG                  | 185bp  |
| 26S rRNA(R1)   |          | GATAGGAAGAGCCGACATCGAAGG                 |        |

**Table S2.** The longevity of attached flowers from WT, *PhERF2*-RNAi and -overexpressing (OE) lines.

|                          | Flower longevity (days $\pm$ SD) |
|--------------------------|----------------------------------|
| Wild-type                | 6.94 $\pm$ 0.58                  |
| <i>PhERF2</i> -RNAi (#1) | 6.88 $\pm$ 0.65                  |
| <i>PhERF2</i> -RNAi (#4) | 6.81 $\pm$ 0.56                  |
| <i>PhERF2</i> -OE (#C)   | 7.06 $\pm$ 0.46                  |
| <i>PhERF2</i> -OE (#D)   | 6.94 $\pm$ 0.68                  |
| <i>PhERF2</i> -OE (#I)   | 7.00 $\pm$ 0.43                  |

Ten flowers from three individual plants for each line were used for studying flower longevity. The time from anthesis to completed wilting of the corolla was recorded. No differences among all the lines tested were observed.
